# Supplementary material for: Comprehensive Ocular and Systemic Safety Evaluation of Polysialic Acid-Decorated Immune Modulating Therapeutic Nanoparticles (PolySia-NPs) to Support Entry into First-in-Human Clinical Trials
Source: MDPI journal article supplement (doi:10.3390/ph17040481), 2024-04-09
Supplement: s1 [file s1]

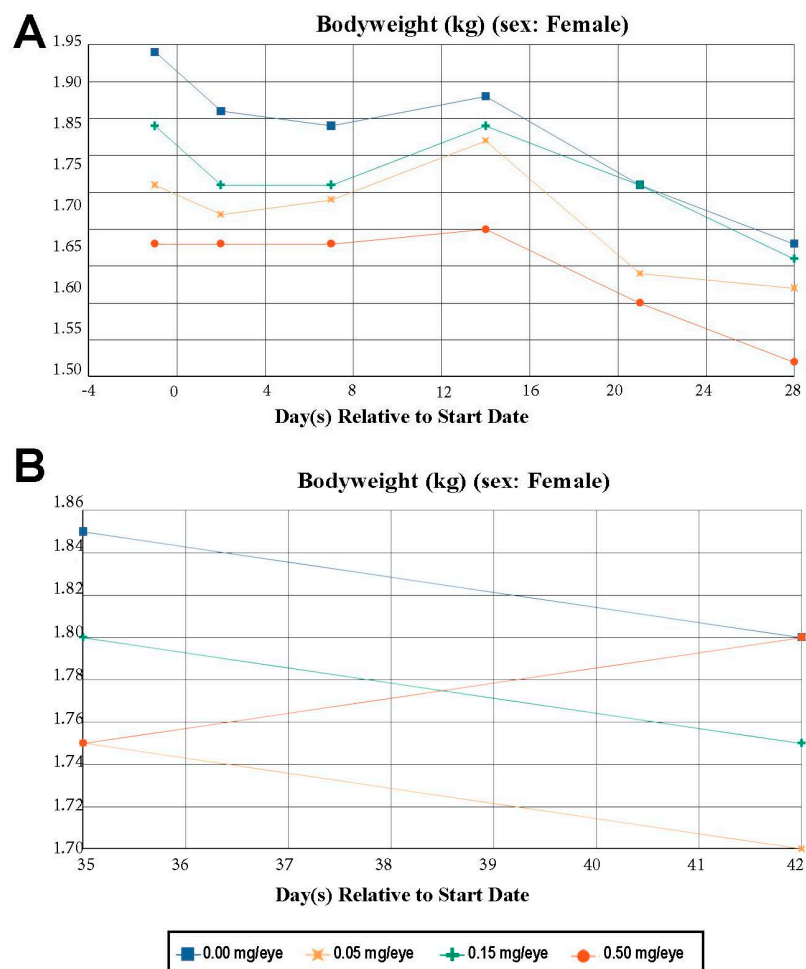

**Figure S1.** Bodyweight changes in female non-human primates after IVT administration of Pol-ySia-NPs recorded for 28 days (**A**) and from day 35 to day 42 (**B**).

**Table S1.** Assessment for abnormal clinical signs and weight changes in the micronucleus assay. Summary of clinical signs (A) and body weights (B).

|                                            |           |           |           |           |          |
|--------------------------------------------|-----------|-----------|-----------|-----------|----------|
| Observation Type: All Types                | Group 1,  | Group 2,  | Group 3,  | Group 4,  | Group 5, |
| Sex: Male                                  | 0         | 208.75    | 417.5     | 835       | 75       |
| From Day -1 (Start Date) to 3 (Start Date) | mg/kg/day | mg/kg/day | mg/kg/day | mg/kg/day | mg/kg    |
| Skin Discolored, Tail/Middle               |           |           |           |           |          |
| Days Observation Recorded                  | 0         | 0         | 1         | 10        | 0        |
| Number of Animals Affected                 | 0         | 0         | 1         | 6         | 0        |
| First to Last seen                         | -         | -         | 3 - 3     | 1 - 3     | -        |

**A. Summary of Clinical Signs - Definitive Micronucleus Assay**

Day(s) Relative to Start Date

| Sex: Male                 |      | Body Weight (g) | Body Weight (g) | Body Weight (g) | Body Weight (g) | Absolute Weight Gain (g) | Absolute Weight Gain (g) |
|---------------------------|------|-----------------|-----------------|-----------------|-----------------|--------------------------|--------------------------|
|                           |      | -1              | 1               | 2               | 3               | 2 → 3                    | 1 → 3                    |
| Group 1, 0 mg/kg/day      | Mean | 35.87           | 35.86           | -               | 35.86           | -                        | 0.01                     |
|                           | SD   | 1.58            | 1.41            | -               | 1.88            | -                        | 0.59                     |
|                           | N    | 5               | 5               | -               | 5               | -                        | 5                        |
| Group 2, 208.75 mg/kg/day | Mean | 35.91           | 35.95           | -               | 36.27           | -                        | 0.32                     |
|                           | SD   | 1.96            | 2.36            | -               | 2.74            | -                        | 0.49                     |
|                           | N    | 5               | 5               | -               | 5               | -                        | 5                        |
| Group 3, 417.5 mg/kg/day  | Mean | 35.94           | 35.37           | -               | 35.57           | -                        | 0.20                     |
|                           | SD   | 1.81            | 1.82            | -               | 1.37            | -                        | 0.62                     |
|                           | N    | 5               | 5               | -               | 5               | -                        | 5                        |
| Group 4, 835 mg/kg/day    | Mean | 35.78           | 35.40           | -               | 35.39           | -                        | -0.02                    |
|                           | SD   | 2.43            | 2.08            | -               | 2.42            | -                        | 0.75                     |
|                           | N    | 7               | 7               | -               | 7               | -                        | 7                        |
| Group 5, 75 mg/kg         | Mean | 35.85           | -               | 35.55           | 35.56           | 0.02                     | -                        |
|                           | SD   | 1.57            | -               | 1.40            | 0.79            | 0.75                     | -                        |
|                           | N    | 5               | -               | 5               | 5               | 5                        | -                        |

**B. Summary of Body Weight Data-Definitive Micronucleus Assay**
